# Supplementary material
Source: PubMed Central journal article supplement (PMC3697702)
Supplement: JCM.00137-13_zjm007132649so1.pdf [file JCM.00137-13_zjm007132649so1.pdf]

**Supplemental material: Sinclair et al. A urine pneumococcal antigen test (BinaxNOW *Streptococcus pneumoniae*) for the diagnosis of community acquired *Streptococcus pneumoniae* pneumonia: A systematic review and meta-analysis**

**Supplementary Figure 1 Flowchart of study selection**

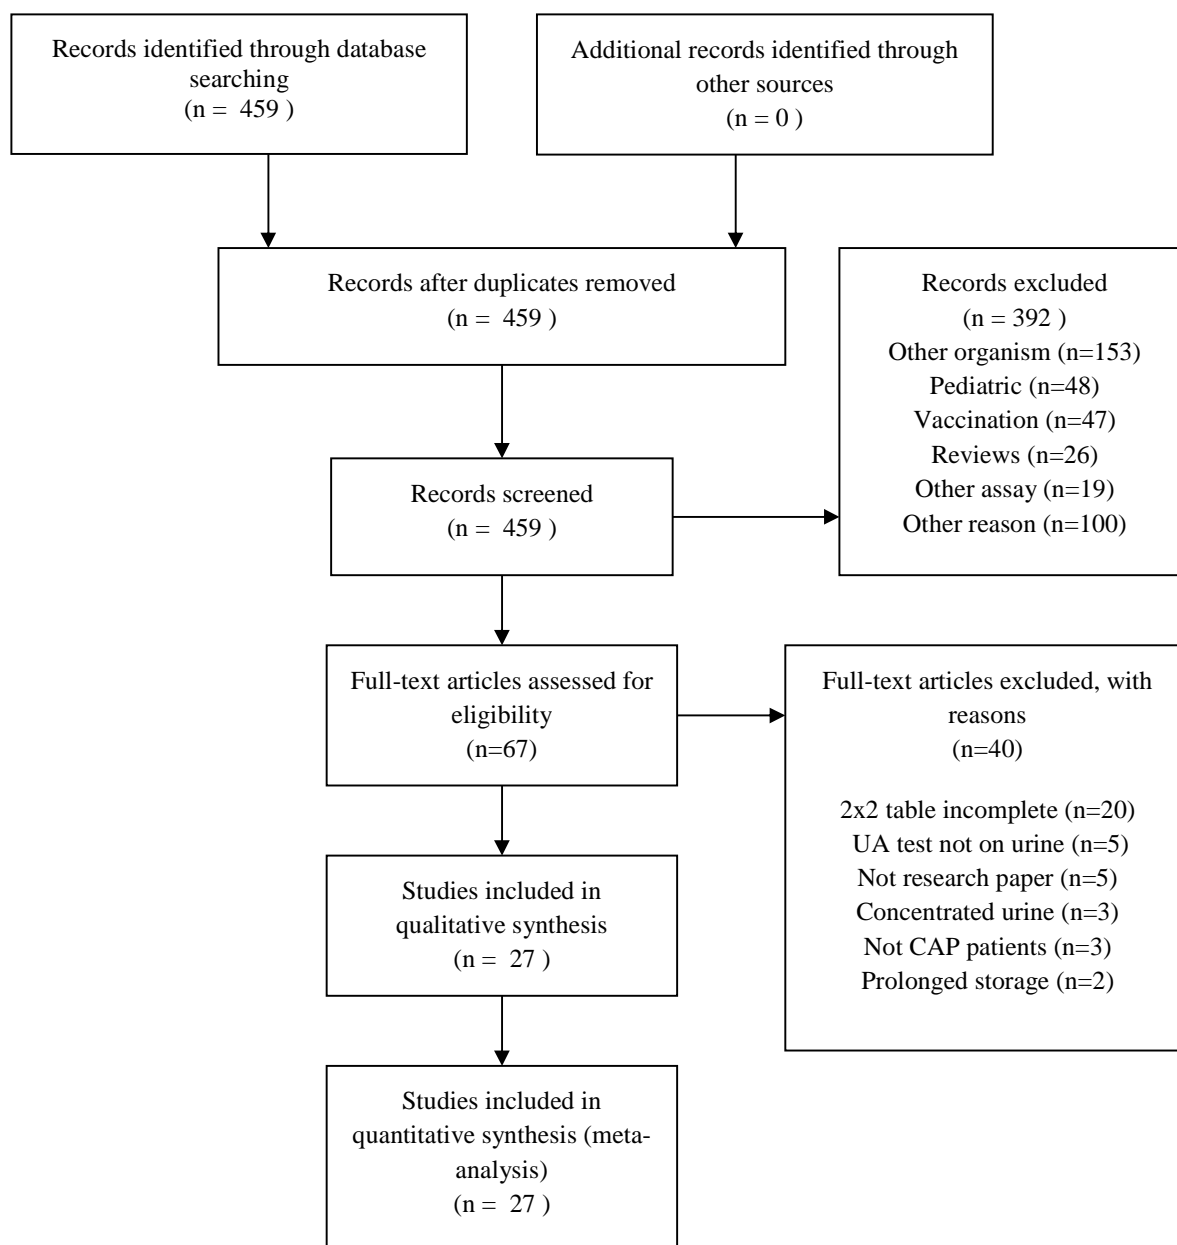

**Supplementary Figure 2 Forest plot showing sensitivity and specificity of BinaxNOW-SP and prevalence of SP in the studies contributing to the meta-analysis, according to the latent class analysis**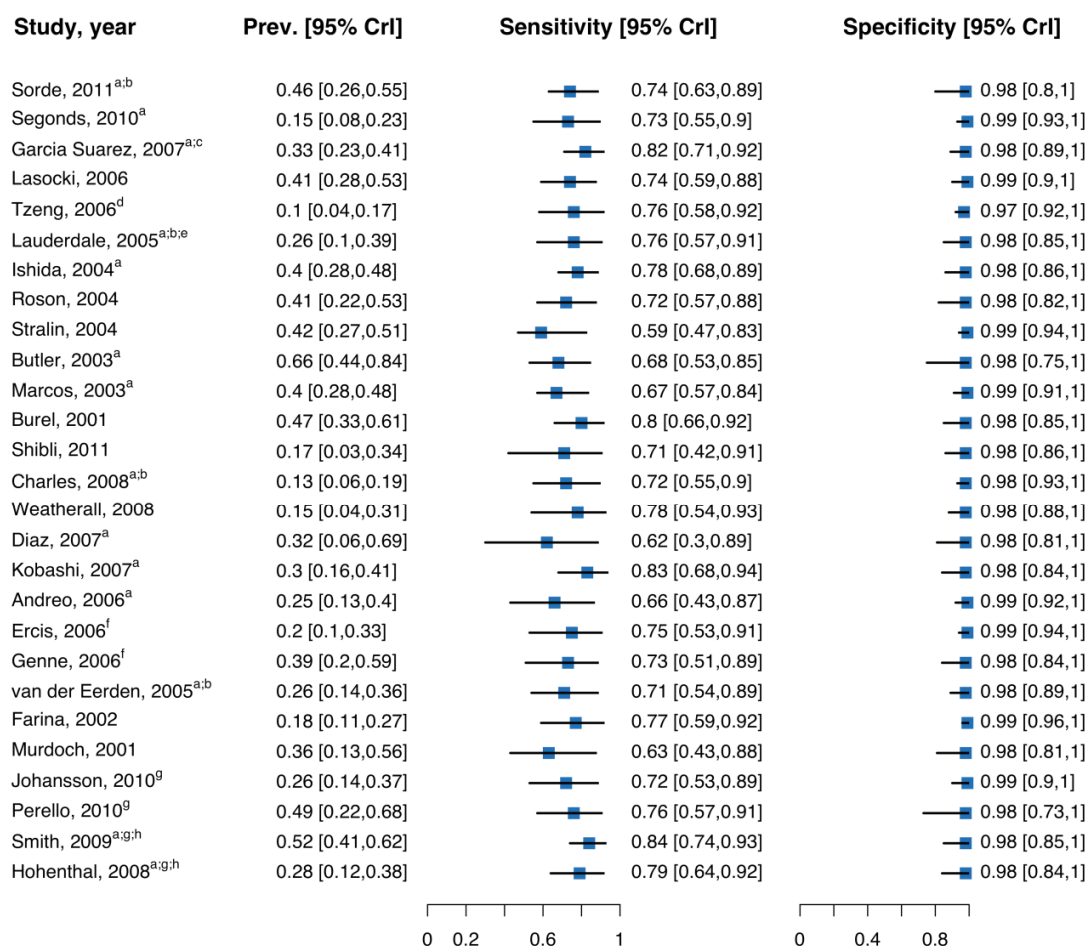

Studies are ordered by date in descending order and grouped according to reference classes, A (11 studies), B (12 studies), and C (4 studies). Footnotes provide additional detail of data interpretation.

<sup>a</sup> Definite and probable SP pneumonia were combined into a single category of SP pneumonia.

<sup>b</sup> Authors' definition of SP included a positive BinaxNOW-SP result. Patients diagnosed solely on the basis of a positive BinaxNOW-SP were treated as false positive results.

<sup>c</sup> Results from the total number of CAP cases derived from the summation of the authors' categories "Pneumococcal infection, Pneumonia", "Pneumococcal infection, Probable pneumococcal pneumonia", "Nonpneumococcal infections, Pneumonia", and "Unknown etiology pneumonia".

<sup>d</sup> Data used for those patients with lower respiratory tract infections (LRTIs).

<sup>e</sup> Analysis restricted to a subset of patients with complete data.

<sup>f</sup> Data used from those patients with CAP. Data from control patients omitted.

<sup>g</sup> Complete data to construct a 2x2 table provided only for positive blood culture as a reference standard.

<sup>h</sup> Results for the total number of CAP cases derived from the summation of the authors' categories "Pneumococcal bacteremia, With pneumonia" and "Nonbacteremic Pneumonia, Combined subtotal"

### Supplementary Table 1 Example searches

Search 1 used plain text in PubMed and OVID, mapped to keywords, and did not attempt to narrow to diagnostic studies.

pneumonia.mp AND ((bacterial antigens.mp. or Antigens, Bacterial/) AND urin\$.mp) OR binax.mp OR urine antigens.mp)

with limits (language EN, FR; humans; age (adult, all NOT child)

Use of wildcards was also explored in OVID, to expand the search:

pneumococc\$ AND ((urin\$ AND antigen\$) OR (BinaxNOW OR Binax))

Search 2 as designed by a reference librarian, used a diagnostic subheading (EMBASE)

---

|    |                                                                                                           |
|----|-----------------------------------------------------------------------------------------------------------|
| 1  | exp antigen/                                                                                              |
| 2  | exp urine/                                                                                                |
| 3  | binax.mp.                                                                                                 |
| 4  | binaxnow.mp.                                                                                              |
| 5  | exp bacterial polysaccharide/                                                                             |
| 6  | or/1-5                                                                                                    |
| 7  | exp Streptococcus pneumoniae/                                                                             |
| 8  | 6 and 7                                                                                                   |
| 9  | exp pneumonia/di, ep [Diagnosis, Epidemiology]                                                            |
| 10 | exp pneumococcal infection/di, ep [Diagnosis, Epidemiology]                                               |
| 11 | exp diagnosis/                                                                                            |
| 12 | exp pneumonia/                                                                                            |
| 13 | exp pneumococcal infection/                                                                               |
| 14 | or/12-13                                                                                                  |
| 15 | 11 and 14                                                                                                 |
| 16 | 9 or 10 or 15                                                                                             |
| 17 | 8 and 16                                                                                                  |
| 18 | limit 17 to yr="2000 -Current"                                                                            |
| 19 | limit 18 to (english or french)                                                                           |
| 20 | limit 19 to animals                                                                                       |
| 21 | 19 not 20                                                                                                 |
| 22 | limit 21 to (embryo or infant or child or preschool child <1 to 6 years> or school child <7 to 12 years>) |
| 23 | limit 22 to (adolescent <13 to 17 years> or adult <18 to 64 years> or aged <65+ years>)                   |
| 24 | 21 not 22                                                                                                 |
| 25 | 23 or 24                                                                                                  |

---

**Supplementary Table 2 Risk of bias in studies reporting diagnosis of *S pneumoniae* community acquired pneumonia using BinaxNOW**

| Reference              | Representative patient spectrum? <sup>a</sup> | Acceptable ref. standard? <sup>b</sup> | Acceptable time between tests? <sup>c</sup> | No partial verification? <sup>d</sup> | No differential verification? <sup>e</sup> | No incorporation? <sup>f</sup> |
|------------------------|-----------------------------------------------|----------------------------------------|---------------------------------------------|---------------------------------------|--------------------------------------------|--------------------------------|
| Sordé, 2011(23)        | Yes                                           | No (A)                                 | Yes: both as part of diagnostic workup.     | Unclear - 129/474                     | Unclear                                    | Yes (data separable)           |
| Segonds, 2010(20)      | Yes                                           | No (A)                                 | Unclear: timing not given                   | Unclear - 247/278                     | Unclear                                    | Yes (data separable)           |
| Garcia-Suarez, 2007(8) | Yes                                           | No (A)                                 | Yes: samples drawn day 1                    | Yes                                   | Yes                                        | Yes                            |
| Lasocki, 2006(14)      | No (All ICU)                                  | No (A)                                 | Unclear: ICU                                | Yes                                   | Yes                                        | Yes                            |
| Tzeng, 2006(25)        | Yes                                           | No (A)                                 | Unclear                                     | Yes                                   | Yes                                        | Yes                            |
| Lauderdale, 2005(15)   | Yes                                           | No (A)                                 | Unclear: urine stored frozen                | Unclear – subset with all tests       | Yes                                        | Yes                            |
| Ishida, 2004(11)       | Yes                                           | No (A)                                 | Yes                                         | Yes                                   | Yes                                        | Yes                            |
| Róson, 2004(19)        | Yes (Minority ambulatory)                     | No (A)                                 | Unclear                                     | Yes                                   | Yes                                        | Yes                            |
| Stralin, 2004(24)      | Yes                                           | No (A)                                 | Unclear: urine stored frozen                | Yes                                   | Unclear                                    | Yes                            |
| Butler, 2003(3)        | Yes                                           | No (A)                                 | Unclear                                     | Yes: 147/149                          | Yes                                        | Yes                            |
| Marcos, 2003 (16)      | Yes                                           | No (A)                                 | Yes                                         | Yes                                   | Yes                                        | Yes                            |
| Burel, 2001 (2)        | Yes                                           | No (A)                                 | Unclear                                     | Yes                                   | Yes                                        | Yes                            |
| Shibli, 2010 (21)      | Yes                                           | No (B)                                 | Yes: sample at admit                        | Yes                                   | Yes                                        | Yes                            |
| Charles, 2008 (4)      | Yes                                           | No (B)                                 | Unclear: within 48h                         | Yes                                   | Yes                                        | Yes (data separable)           |
| Weatherall, 2008 (27)  | Yes                                           | No (B)                                 | Yes                                         | Yes                                   | Yes                                        | Yes                            |
| Diaz, 2007 (5)         | Yes                                           | No (B)                                 | Unclear: time of BinaxNOW-SP not given      | Yes                                   | Yes                                        | Yes                            |
| Kobashi, 2007 (13)     | Yes                                           | No (B)                                 | Unclear: BinaxNOW-SP at "acute stage"       | Yes                                   | Yes                                        | Yes                            |
| Andreo, 2006 (1)       | Yes                                           | No (B)                                 | Unclear: urine stored frozen                | Unclear - 92/107                      | Unclear                                    | Yes (data are separable)       |
| Ercis, 2006 (6)        | Yes                                           | No (B)                                 | Yes                                         | Unclear - 52/59                       | Unclear                                    | Yes                            |

<sup>a</sup> Was the spectrum of patients representative of the patients who will receive the test in practice?

<sup>b</sup> Was the reference standard likely to classify the target condition correctly? The letter in brackets indicates the reference class.

<sup>c</sup> Was the time period between reference standard and index test short enough to be reasonably sure that the target condition did not change between the two tests?

<sup>d</sup> Did the whole sample or a random selection of the sample, receive verification using the intended reference standard?

<sup>e</sup> Did patients receive the same reference standard irrespective of the index test result?

<sup>f</sup> Was the reference standard independent of the index test (i.e. the index test did not form part of the reference standard)?

| Reference                 | Representative patient spectrum? <sup>a</sup> | Acceptable ref. standard? <sup>b</sup> | Acceptable time between tests? <sup>c</sup>        | No partial verification? <sup>d</sup> | No differential verification? <sup>e</sup> | No incorporation? <sup>f</sup> |
|---------------------------|-----------------------------------------------|----------------------------------------|----------------------------------------------------|---------------------------------------|--------------------------------------------|--------------------------------|
| Genne, 2006 (9)           | Yes                                           | No (B)                                 | Unclear: taken at admit, but allowed up to 6 days. | Yes                                   | Yes                                        | Yes                            |
| Van der Eerden, 2005 (26) | Yes                                           | No (B)                                 | Yes: sample at admission                           | Yes                                   | Yes                                        | Yes                            |
| Farina, 2002 (7)          | Yes                                           | No (B)                                 | Unclear                                            | Yes                                   | Yes                                        | Yes                            |
| Murdoch, 2001(17)         | Yes                                           | No (B)                                 | Yes                                                | Yes                                   | Yes                                        | Yes                            |
| Johansson, 2010(12)       | Yes                                           | No (C)                                 | Yes, within 1 day                                  | Yes                                   | Yes                                        | Yes                            |
| Perello, 2010(18)         | No (All HIV)                                  | No (C)                                 | Yes: sample at admission                           | Unclear - 96/129                      | Unclear                                    | Yes                            |
| Smith, 2009 (22)          | Yes                                           | No (C)                                 | Unclear: blood obtained within 24h abx start       | Yes                                   | Yes                                        | Yes                            |
| Hohenthal, 2008 (10)      | Yes                                           | No (C)                                 | Unclear                                            | Unclear                               | Yes                                        | Yes                            |

**Supplementary Table 2 (cont) Risk of bias in studies reporting diagnosis of *S pneumonia* community acquired pneumonia using BinaxNOW**

| Reference                 | Index results blinded? <sup>g</sup> | Ref. results blinded? <sup>h</sup>             | Same clinical info? <sup>i</sup> | Uninterpretable results explained? <sup>j</sup> | Withdrawals explained? <sup>k</sup> |
|---------------------------|-------------------------------------|------------------------------------------------|----------------------------------|-------------------------------------------------|-------------------------------------|
| Sordé, 2011(23)           | Unclear                             | Yes                                            | Yes                              | None described                                  | No                                  |
| Segonds, 2010(20)         | Unclear                             | Unclear                                        | Unclear                          | None described                                  | No                                  |
| Garcia-Suarez, 2007(8)    | Unclear: samples were stored        | Yes                                            | Yes                              | None described                                  | All tested                          |
| Lasocki, 2006(14)         | Unclear: timing?                    | Unclear: ICU, so possible later investigations | Unclear: timing?                 | None described                                  | All tested                          |
| Tzeng, 2006(25)           | Unclear                             | Unclear                                        | Yes                              | None described                                  | All tested                          |
| Lauderdale, 2005(15)      | Unclear: samples were stored        | Unclear                                        | Yes                              | None described                                  | No - stated did not have samples    |
| Ishida, 2004(11)          | Yes: tested at admit                | Unclear                                        | Yes                              | None described                                  | All tested                          |
| Róson, 2004(19)           | Unclear                             | Unclear                                        | Yes                              | None described                                  | All tested                          |
| Stralin, 2004(24)         | Yes: explicitly stated              | Yes                                            | Yes                              | Yes: described equivocal                        | All tested                          |
| Butler, 2003(3)           | Unclear: frozen urine               | Unclear                                        | Yes                              | None described                                  | All but 2 tested                    |
| Marcos, 2003 (16)         | Unclear                             | Unclear                                        | Yes                              | None described                                  | All tested                          |
| Burel, 2001 (2)           | Unclear                             | Unclear                                        | Yes                              | None described                                  | All tested                          |
| Shibli, 2010 (21)         | Unclear                             | Unclear                                        | Yes                              | None described                                  | All tested                          |
| Charles, 2008 (4)         | Unclear: within 48h                 | Unclear                                        | Yes                              | None described                                  | All tested                          |
| Weatherall, 2008 (27)     | Yes: tested in ED                   | Unclear                                        | Yes                              | None described                                  | All tested                          |
| Diaz, 2007 (5)            | Unclear                             | Unclear                                        | Yes                              | None described                                  | All tested                          |
| Kobashi, 2007 (13)        | Yes: stated                         | Unclear                                        | Yes                              | None described                                  | All tested                          |
| Andreo, 2006 (1)          | Unclear: urine frozen               | Unclear                                        | Unclear                          | None described                                  | No                                  |
| Ercis, 2006 (6)           | Unclear                             | Unclear                                        | Yes                              | None described                                  | No                                  |
| Genne, 2006 (9)           | Unclear: timing?                    | Yes                                            | Yes                              | None described                                  | All tested                          |
| Van der Eerden, 2005 (26) | Unclear                             | Unclear                                        | Yes                              | None described                                  | All tested                          |
| Farina, 2002(7)           | Unclear                             | Unclear                                        | Yes                              | None described                                  | All tested                          |
| Murdoch, 2001(17)         | Unclear: transported for testing    | Unclear                                        | Yes                              | None described                                  | All tested                          |
| Johansson, 2010(12)       | Unclear                             | Unclear                                        | Yes                              | None described                                  | All tested                          |
| Perello, 2010(18)         | Yes                                 | Unclear                                        | Unclear                          | None described                                  | No                                  |
| Smith, 2009 (22)          | Yes: "tested prospectively"         | Unclear                                        | Unclear                          | None described                                  | All tested                          |
| Hohenthal, 2008 (10)      | Unclear                             | Unclear                                        | Yes                              | None described                                  | All tested                          |

<sup>g</sup> Were the reference standard results interpreted without knowledge of the results of the index test? Were the index test results interpreted without knowledge of the results of the reference standard?

<sup>h</sup> Were the index test results interpreted without knowledge of the results of the reference standard?

<sup>i</sup> Were the same clinical data available when test results were interpreted as would be available when the test is used in practice?

<sup>j</sup> Were uninterpretable/ intermediate test results reported?

<sup>k</sup> Were withdrawals from the study explained?

## References:

1. **Andreo F, Domínguez J, Ruiz J, Blanco S, Arellano E, Prat C, Morera J, Ausina V.** 2006. Impact of rapid urine antigen tests to determine the etiology of community-acquired pneumonia in adults. *Respir. Med.* **100**:884-891.
2. **Burel E, Dufour P, Gauduchon V, Jarraud S, Etienne J.** 2001. Evaluation of a rapid immunochromatographic assay for detection of *Streptococcus pneumoniae* antigen in urine samples. *Eur. J. Clin. Microbiol. Infect. Dis.* **20**:840-841.
3. **Butler JC, Bosshardt SC, Phelan M, Moroney SM, Tondella ML, Farley MM, Schuchat A, Fields BS.** 2003. Classical and latent class analysis evaluation of sputum polymerase chain reaction and urine antigen testing for diagnosis of pneumococcal pneumonia in adults. *J. Infect. Dis.* **187**:1416-1423.
4. **Charles PG, Whitby M, Fuller AJ, Stirling R, Wright AA, Korman TM, Holmes PW, Christiansen KJ, Waterer GW, Pierce RJ, Mayall BC, Armstrong JG, Catton MG, Nimmo GR, Johnson B, Hooy M, Grayson ML.** 2008. The etiology of community-acquired pneumonia in Australia: Why penicillin plus doxycycline or a macrolide is the most appropriate therapy. *Clin. Infect. Dis.* **46**:1513-1521.
5. **Díaz A, Barria P, Niederman M, Restrepo MI, Dreyse J, Fuentes G, Couble B, Saldias F.** 2007. Etiology of community-acquired pneumonia in hospitalized patients in Chile: The increasing prevalence of respiratory viruses among classic pathogens. *Chest* **131**:779-787.
6. **Ercis S, Ergin A, Sahin GO, Hascelik G, Uzun O.** 2006. Validation of urinary antigen test for *Streptococcus pneumoniae* in patients with pneumococcal pneumonia. *Jpn. J. Infect. Dis.* **59**:388-390.
7. **Farina C, Arosio M, Vailati F, Muioli F, Goglio A.** 2002. Urinary detection of *Streptococcus pneumoniae* antigen for diagnosis of pneumonia. *New Microbiol.* **25**:259-263.
8. **del Mar García-Suárez M, Cima-Cabal MD, Villaverde R, Espinosa E, Falguera M, de Los Toyos JR, Vázquez F, Méndez FJ.** 2007. Performance of a pneumolysin enzyme-linked immunosorbent assay for diagnosis of pneumococcal infections. *J. Clin. Microbiol.* **45**:3549-3554.
9. **Genne D, Siegrist HH, Lienhard R.** 2006. Enhancing the etiologic diagnosis of community-acquired pneumonia in adults using the urinary antigen assay (Binax NOW). *J. Infect. Dis.* **10**:124-128.
10. **Hohenthal U, Vainionpää R, Meurman O, Vahtera A, Katiskalahti T, Nikoskelainen J, Kotilainen P.** 2008. Aetiological diagnosis of community acquired pneumonia: Utility of rapid microbiological methods with respect to disease severity. *Scand. J. Infect. Dis.* **40**:131-138.
11. **Ishida T, Hashimoto T, Arita M, Tojo Y, Tachibana H, Jinnai M.** 2004. A 3-year prospective study of a urinary antigen-detection test for *Streptococcus pneumoniae* in community-acquired pneumonia: utility and clinical impact on the reported etiology. *J. Infect. Chemother.* **10**:359-363.
12. **Johansson N, Kalin M, Annika T-L, Giske CG, Hedlund J.** 2010. Etiology of Community-Acquired pneumonia: Increased microbiological yield with new diagnostic methods. *Clin. Infect. Dis.* **50**:202-209.
13. **Kobashi Y, Yoshida K, Miyashita N, Niki Y, Matsushima T.** 2007. Evaluating the use of a *Streptococcus pneumoniae* urinary antigen detection kit for the management of community-acquired pneumonia in Japan. *Respiration* **74**:387-393.
14. **Lasocki S, Scanvic A, Le Turdu F, Restoux A, Mentec H, Bleichner G, Sollet JP.** 2006. Evaluation of the Binax NOW *Streptococcus pneumoniae* urinary antigen assay in intensive care patients hospitalized for pneumonia. *Intensive Care Med.* **32**:1766-1772.

15. **Lauderdale TL, Chang FY, Ben RJ, Yin HC, Ni YH, Tsai JW, Cheng SH, Wang JT, Liu YC, Cheng YW, Chen ST, Fung CP, Chuang YC, Cheng HP, Lu DC, Liu CJ, Huang IW, Hung CL, Hsiao CF, Ho M.** 2005. Etiology of community acquired pneumonia among adult patients requiring hospitalization in Taiwan. *Respir. Med.* **99**:1079-1086.
16. **Marcos MA, Jimenez de Anta MT, de la Bellacasa JP, Gonzalez J, Martinez E, Garcia E, Mensa J, de Roux A, Torres A.** 2003. Rapid urinary antigen test for diagnosis of pneumococcal community-acquired pneumonia in adults. *Eur. Respir. J.* **21**:209-214.
17. **Murdoch DR, Laing RT, Mills GD, Karalus NC, Town GI, Mirrett S, Reller LB.** 2001. Evaluation of a rapid immunochromatographic test for detection of *Streptococcus pneumoniae* antigen in urine samples from adults with community-acquired pneumonia. *J. Clin. Microbiol.* **39**:3495-3498.
18. **Perelló R, Miró O, Marcos MA, Almela M, Bragulat E, Sánchez M, Agustí C, Miro JM, Moreno A.** 2010. Predicting bacteremic pneumonia in HIV-1-infected patients consulting the ED. *Am. J. Emerg. Med.* **28**:454-459.
19. **Rosón B, Fernández-Sabé N, Carratalà J, Verdaguer R, Dorca J, Manresa F, Gudiol F.** 2004. Contribution of a urinary antigen assay (Binax NOW) to the early diagnosis of pneumococcal pneumonia. *Clin. Infect. Dis.* **38**:222-226.
20. **Segonds C, Le GA, Chabanon G.** 2010. Assessment of the contribution of the immunochromatographic pneumococcal urinary antigen test to the etiological diagnosis of pneumonia in hospitalized adults. *Pathol. Biol. (Paris)*; **58**:117-122. [In French].
21. **Shibli F, Chazan B, Nitzan O, Flatau E, Edelstein H, Blondheim O, Raz R., Colodner R.** 2010. Etiology of community-acquired pneumonia in hospitalized patients in Northern Israel. *Isr. Med. Assoc. J.* **12**:477-482.
22. **Smith MD, Sheppard CL, Hogan A, Harrison TG, Dance DA, Derrington P, George RC.** 2009. Diagnosis of *Streptococcus pneumoniae* infections in adults with bacteremia and community-acquired pneumonia: clinical comparison of pneumococcal PCR and urinary antigen detection. *J. Clin. Microbiol.* **47**:1046-1049.
23. **Sorde R, Falco V, Lowak M, Domingo E, Ferrer A, Burgos J, Puig M, Cabral E, Len O, Pahissa A.** 2011. Current and potential usefulness of pneumococcal urinary antigen detection in hospitalized patients with community-acquired pneumonia to guide antimicrobial therapy. *Arch. Intern. Med.* **171**:166-172.
24. **Stralin K, Kaltoft MS, Konradsen HB, Olcen P, Holmberg H.** 2004. Comparison of two urinary antigen tests for establishment of pneumococcal etiology of adult community-acquired pneumonia. *J. Clin. Microbiol.* **42**:3620-3625.
25. **Tzeng DH, Lee YL, Lin YH, Tsai CA, Shi ZY.** 2006. Diagnostic value of the Binax NOW assay for identifying a pneumococcal etiology in patients with respiratory tract infection. *J. Microbiol. Immunol. Infect.* **39**:39-44.
26. **Van Der Eerden MM, Vlaspolder F, De Graaff CS, Groot T, Jansen HM, Boersma WG.** 2005. Value of intensive diagnostic microbiological investigation in low- and high-risk patients with community-acquired pneumonia. *Eur. J. Clin. Microbiol. Infect. Dis.* **24**:241-249.
27. **Weatherall C, Paoloni R, Gottlieb T.** 2008. Point-of-care urinary pneumococcal antigen test in the emergency department for community acquired pneumonia. *Emerg. Med. J.* **25**:144-148.
